# Supplementary material
Source: Springer Nature journal article supplement (https://www.springermedizin.de/resource/supplementary/12974_2011_426_MOESM2_ESM.pdf/9601240)

**A.**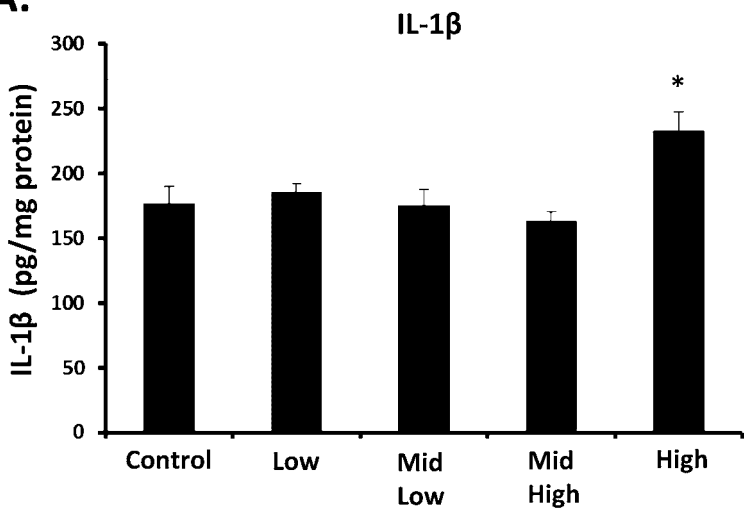**B.**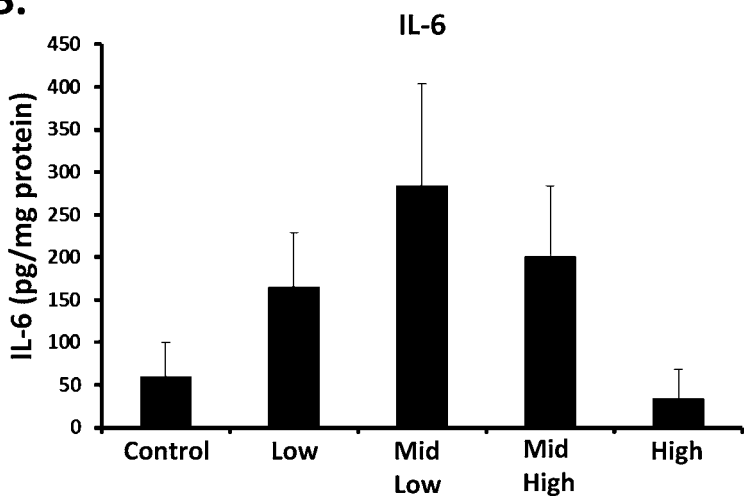**C.**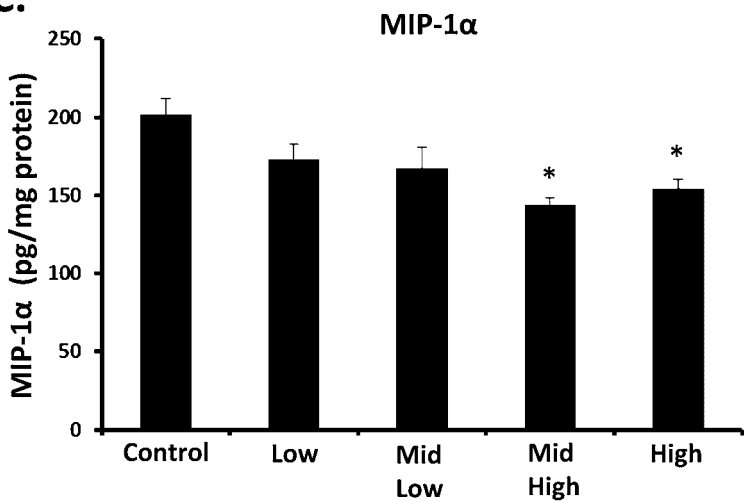

Supplement: MOESM2 [file 9601240]
